# Supplementary material for: Identification and in situ removal of an inhibitory intermediate to develop an efficient phytosterol bioconversion process using a cyclodextrin-resting cell system
Source: Royal Society of Chemistry journal article supplement (doi:10.1039/d1ra02774c), 2021-01-01
Supplement: d1ra02774c1.pdf [file d1ra02774c1.pdf]

Electronic Supplementary Material (ESI) for RSC Advances.

This journal is © The Royal Society of Chemistry 202x

### Supporting Information

Identification and in situ removal of inhibitory intermediate to  
develop an efficient phytosterol bioconversion process using a  
cyclodextrin-resting cells system

Da Wang,<sup>#a</sup> Jian Zhang, <sup>#a</sup> Dan-Dan Cao,<sup>a</sup> Xuedong Wang<sup>\*a</sup> and Dongzhi Wei <sup>a</sup>

<sup>a</sup> State Key Laboratory of Bioreactor Engineering, New World Institute of Biotechnology, East China  
University of Science and Technology, Shanghai 200237, China

<sup>#</sup> These authors contributed equally to this work

<sup>\*</sup> Correspondence to: Xuedong Wang

E-mail addresses: [xdwang@ecust.edu.cn](mailto:xdwang@ecust.edu.cn)

Tel.: +86-21-64253715, Fax: +86-21-64250068.

**Table S1** Detailed parameters of the macroporous adsorbent resin used.

| Resin   | Manufacturers                          | Polarity     | Specific surface area (m <sup>2</sup> /g) | Pore diameter (nm) | Particle size (μm) |
|---------|----------------------------------------|--------------|-------------------------------------------|--------------------|--------------------|
| D 101   | Haiguang Chemical Co., Ltd             | Non-polar    | 480-520                                   | 9-10               | 300-1250           |
| SP 207  | Mitsubishi Chemical Industries Limited | Non-polar    | 900-950                                   | 4-5                | 250-1000           |
| HZ 820  | Huazhen Technology Co., Ltd            | Non-polar    | 950-1000                                  | 13-15              | 380-1200           |
| HZ 818  | Huazhen Technology Co., Ltd            | Non-polar    | 880-920                                   | 7-8                | 315-1250           |
| HZ 806  | Huazhen Technology Co., Ltd            | Middle-polar | 450-550                                   | 6-7                | 315-1250           |
| HZ 801  | Huazhen Technology Co., Ltd            | Non-polar    | 500-550                                   | 12-14              | 315-1250           |
| HPD 826 | Baoen Chemical Co., Ltd                | Non-polar    | 485-530                                   | 13-14              | 300-1250           |
| HPD 500 | Baoen Chemical Co., Ltd                | Polar        | 500-550                                   | 5-6                | 300-1200           |
| HPD 300 | Baoen Chemical Co., Ltd                | Non-polar    | 800-870                                   | 5-7                | 300-1200           |
| HPD 100 | Baoen Chemical Co., Ltd                | Non-polar    | 650-700                                   | 8-9                | 300-1250           |

Note: All adsorbents are polystyrene-divinylbenzene type resins. The parameters depicted in the table were obtained from the manufacturer.

Phytosterols (the main components are campesterol, stigmasterol,  $\beta$ -sitosterol) were used as substrates to obtain steroid intermediates catalyzed by *Mycobacterium neoaurum* NwIB-HK86. The separation and purification of the metabolic intermediates adsorbed in resins was performed by silica gel column chromatography. To prepare the silica gel column, 30 g of silica gel (200-300 mesh) was weighed and mixed in hexane and then packed in a glass column (I.D.21 mm  $\times$  H200 mm). Subsequently, silica gel with sample were loaded on the column. The intermediates were desorbed by an eluant consisting of hexane and ethyl acetate (hexane: ethyl acetate=5:1, v/v) at a flow rate of 80 mL/h. The eluant was collected per 20 mL. After separation, the samples of the same products identified by TLC were collected together and then dried with a rotary evaporator.

5  $\mu$ L of samples were applied to silica gel plate (MERCK TLC Silica gel 60 F<sub>254</sub>, Germany), developed in n-hexane/ethyl acetate/chloroform (5:5:2, v/v/v). The visualization was performed under 254 nm UV light and 20% sulfuric acid solution (115 °C for 15 minutes), respectively.

Multiple types of metabolites produced during bioconversion were adsorbed by the resins. The putative inhibitor was identified using ultra-performance liquid chromatography-tandem mass spectrometry (UPLC-MS/MS, Thermo Scientific \*Q-Exactive plus, USA) to determine the molecular weight and fragmentation pattern of these compounds. Masses were recorded in positive mode in the range of 50-6000 m/z. A Hypersil Gold C18 (2.1 mm $\times$  100 mm) column was used and methanol-water (70% methanol at 0–1 min, linear gradient from 70–100% methanol in 20 min, keep 100% methanol at 20-25 min, and then linear gradient from 100–70% methanol in 3 min, keep for 3 min to equilibrate the column) was used as the mobile phase at a flow rate of 1 mL/min and UV detector at 254 nm.

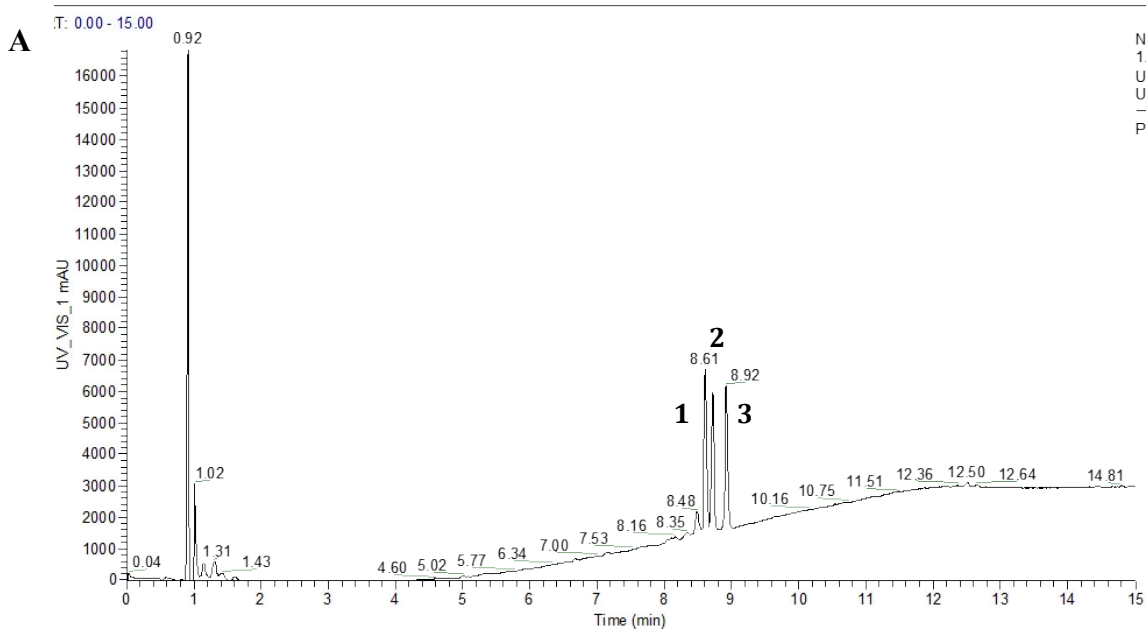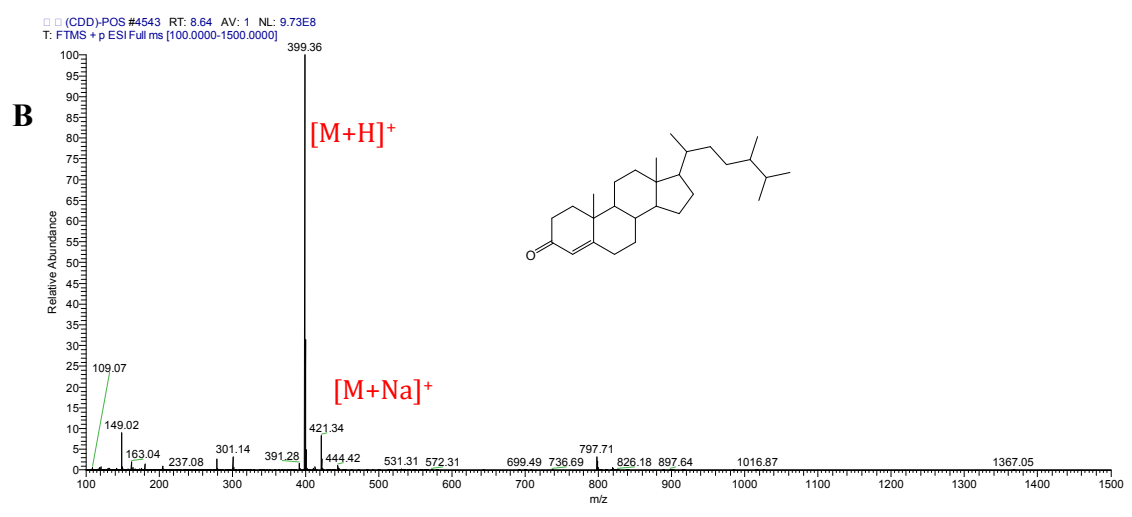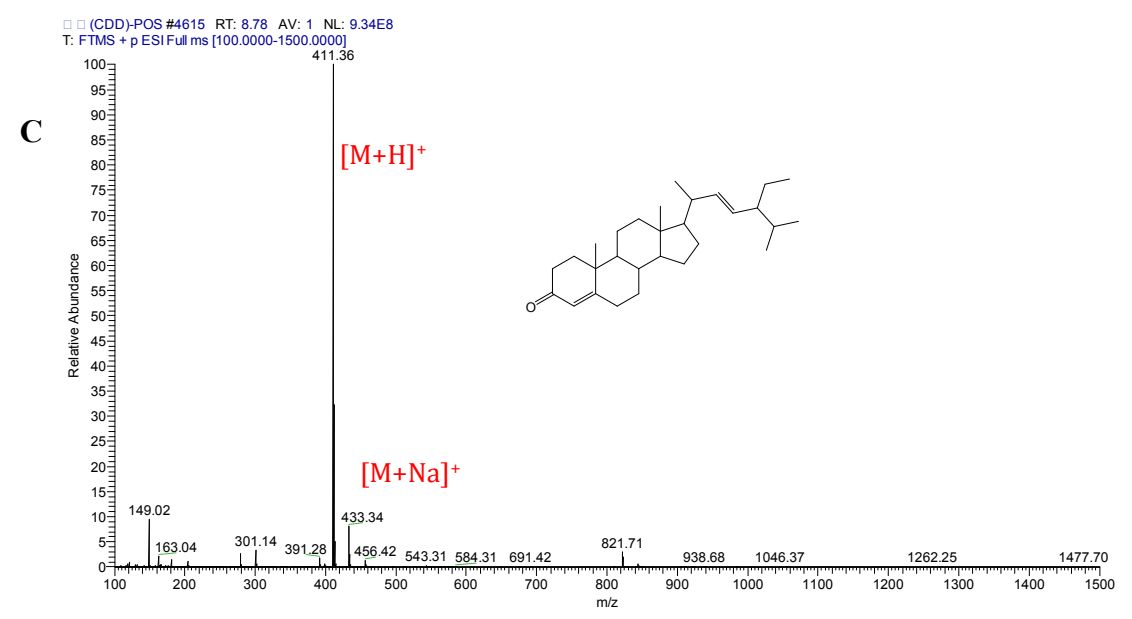

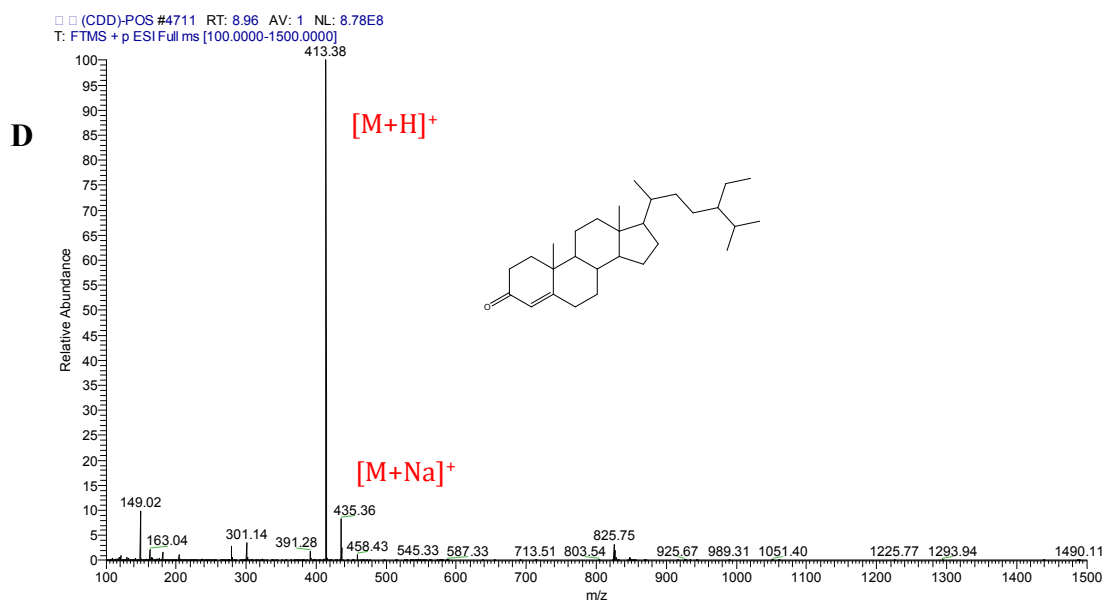

**Figure S1.** Identification of putative inhibitory intermediates by UPLC-MS/MS. A, UPLC profiles of 4-ene-3-keto steroids; B, MS of 4-ene-3-keto steroids produced from campesterol, corresponding to peak 1 in the UPLC profile; C, MS of 4-ene-3-keto steroids produced from stigmasterol, corresponding to peak 2 in the UPLC profile; D, MS of 4-ene-3-keto steroids produced from  $\beta$ -sitosterol, corresponding to peak 3 in the UPLC profile.

Quantitative analysis of 4-ene-3-keto steroids was performed by HPLC equipped with an Agilent ZORBAX 300SB-C8 (4.6 mm× 250 mm) column. Methanol-water (80:20, v/v) was used as the mobile phase at a flow rate of 1 mL/min and UV detector at 254 nm. 4-ene-3-keto steroids content in 12 h samples of the control group, which total peak areas was 298.48, was set to a relative concentration of 1 in the manuscript (the relative content of 4-ene-3-keto steroids can be calculated according to the following formula:

$$\text{Relative content of 4-ene-3-keto steroids} = \frac{\text{Area}(4\text{-ene-3-keto steroids})}{298.48}$$

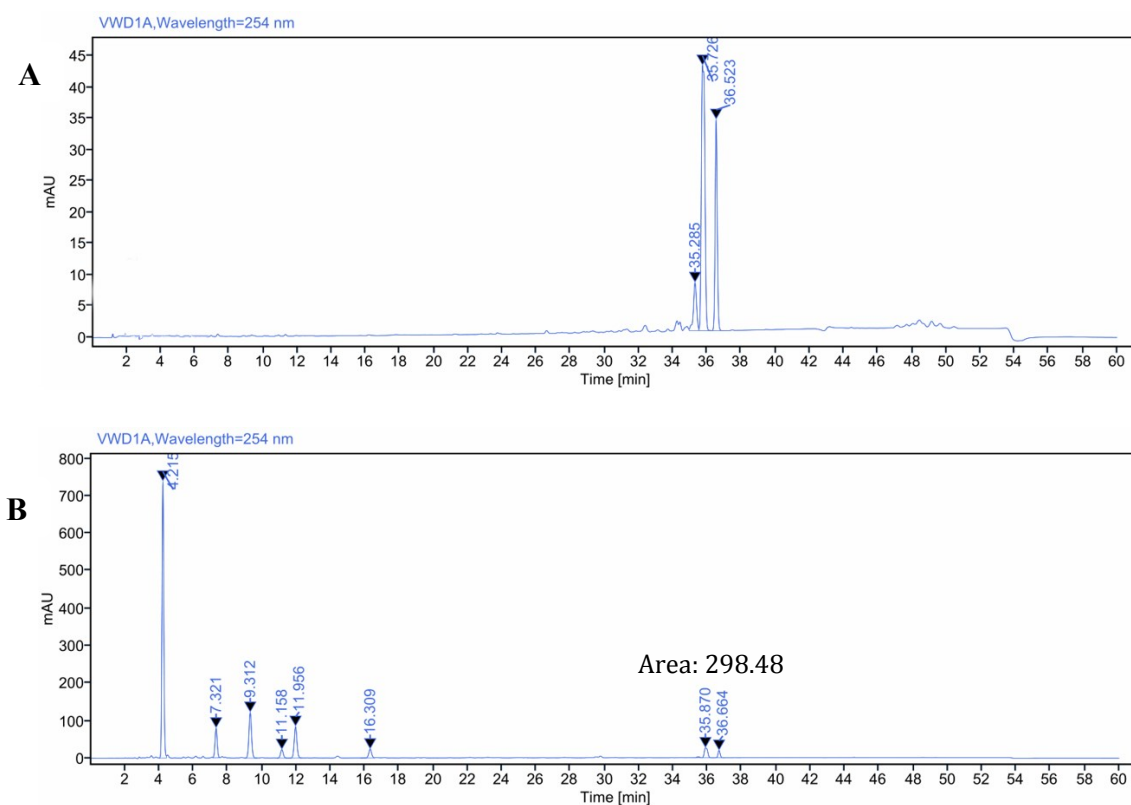

**Figure S2.** HPLC profiles of 4-ene-3-keto steroids. A, 4-ene-3-keto steroids obtained by silica gel column chromatography; B, 4-ene-3-keto steroids content in 12 h samples of the control group.
